# Supplementary material for: In vitro Characterization of Gut Microbiota-Derived Bacterial Strains With Neuroprotective Properties
Source: PubMed Central journal article supplement (PMC6763572; doi:10.3389/fncel.2019.00402), 2019-09-20
Supplement: Table_1.pdf [file Table_1.pdf]

### Supplementary Table S1

List of primers used for *in vitro* gene expression analysis by qPCR.

| <b>Gene ID</b> | <b>Forward sequence</b> | <b>Reverse sequence</b> |
|----------------|-------------------------|-------------------------|
| <b>ACTB</b>    | GATCAAGATCATTGCTCCTC    | TTGTCAAGAAAGGGTGTAAC    |
| <b>GAPDH</b>   | GGTATCGTGGAAGGACTCATG   | ATGCCAGTGAGCTTCCCGTTC   |
| <b>MAP2</b>    | CTCAGCACCGCTAACAGAGG    | CATTGGCGCTTCTCTCCTC     |
| <b>SYP</b>     | CTCGGCTTTGTGAAGGTGCT    | GGCTTCATGGCATCAACTTCA   |
